# Supplementary material for: Bilateral Salpingo-oophorectomy Compared to Gonadotropin-Releasing Hormone Agonists in Premenopausal Hormone Receptor?Positive Metastatic Breast Cancer Patients Treated with Aromatase Inhibitors
Source: PubMed Central journal article supplement — Cancer Res Treat. 2017 Feb 27;49(4):1153–63. doi: 10.4143/crt.2016.463 (PMC5654164; doi:10.4143/crt.2016.463), 2017-02-27
Supplement: crt-2016-463-suppl1.pdf [file crt-2016-463-suppl1.pdf]

**S1 Table.** Patient characteristics of propensity score matched cohort

| Variable                              | No.<br>(n=36) | OFS modality         |                     | p-value |
|---------------------------------------|---------------|----------------------|---------------------|---------|
|                                       |               | BSO<br>(n=18)        | GnRHa<br>(n=18)     |         |
| Age at AI treatment (yr)              |               | 47 (36-53)           | 39 (29-49)          | 0.001   |
| Pathology                             |               |                      |                     |         |
| IDC                                   | 34            | 16 (89)              | 18 (100)            | 0.486   |
| Others                                | 2             | 2 (11)               | 0                   |         |
| Intrinsic subtype by IHC              |               |                      |                     |         |
| Luminal A                             | 19            | 10 (56)              | 9 (50)              | 0.881   |
| Luminal B, HER2 negative              | 12            | 6 (33)               | 6 (33)              |         |
| Unknown                               | 5             | 2 (11)               | 3 (17)              |         |
| Disease status at AI treatment        |               |                      |                     |         |
| MBC at primary diagnosis              | 12            | 6 (33)               | 6 (33)              | > 0.99  |
| Recurred                              | 24            | 12 (67)              | 12 (67)             |         |
| Curative operation                    | 24            | 12 (67)              | 12 (67)             | > 0.99  |
| Neoadjuvant/adjuvant chemotherapy     | 23            | 11 (92)              | 12 (100)            | > 0.99  |
| Radiation therapy                     | 14            | 8 (67)               | 6 (50)              | 0.408   |
| Adjuvant hormone therapy              | 22            | 11 (92)              | 11 (92)             | > 0.99  |
| Tamoxifen                             | 16            | 8 (73)               | 8 (73)              | 0.549   |
| Tamoxifen+GnRHa                       | 5             | 3 (27)               | 2 (18)              |         |
| AI <sup>a)</sup>                      | 1             | 0                    | 1 (9)               |         |
| RFI (mo)                              |               | 44.0<br>(16.8-102.0) | 38.7<br>(21.0-80.5) | 0.732   |
| Previous palliative chemotherapy      |               |                      |                     |         |
| No                                    | 18            | 10 (56)              | 8 (44)              | 0.505   |
| Yes                                   | 18            | 8 (44)               | 10 (56)             |         |
| Previous palliative endocrine therapy |               |                      |                     |         |
| No                                    | 18            | 8 (44)               | 10 (56)             | 0.505   |
| Yes                                   | 18            | 10 (56)              | 8 (44)              |         |
| Tamoxifen                             | 6             | 3 (17)               | 3 (18)              |         |
| Tamoxifen+GnRHa                       | 7             | 3 (17)               | 4 (24)              |         |
| GnRHa                                 | 3             | 3 (17)               | 0                   |         |
| AI <sup>a)</sup>                      | 2             | 1 (6)                | 1 (6)               |         |
| Extent of disease at AI treatment     |               |                      |                     |         |
| Bone and soft tissue only             | 13            | 7 (39)               | 6 (33)              | 0.729   |
| Visceral metastasis                   | 23            | 11 (61)              | 12 (67)             |         |
| Line of AI as palliative treatment    |               |                      |                     |         |
| 1st line                              | 9             | 5 (28)               | 4 (22)              | 0.921   |
| 2nd line                              | 19            | 9 (50)               | 10 (56)             |         |
| ≥ 3rd line                            | 8             | 4 (22)               | 4 (22)              |         |

Values are presented as median (range) or number (%). OFS, ovarian function suppression; BSO, bilateral salpingoophorectomy; GnRHa, gonadotropin-releasing hormone agonist; AI, aromatase inhibitor; IDC, infiltrating ductal carcinoma; IHC, immunohistochemistry; HER2, human epidermal growth factor receptor 2; MBC, metastatic breast cancer; RFI, relapse-free interval. <sup>a)</sup>AI due to chemotherapy-induced amenorrhea.
