# Supplementary material for: Bilateral Salpingo-oophorectomy Compared to Gonadotropin-Releasing Hormone Agonists in Premenopausal Hormone Receptor?Positive Metastatic Breast Cancer Patients Treated with Aromatase Inhibitors
Source: PubMed Central journal article supplement — Cancer Res Treat. 2017 Feb 27;49(4):1153–63. doi: 10.4143/crt.2016.463 (PMC5654164; doi:10.4143/crt.2016.463), 2017-02-27
Supplement: crt-2016-463-suppl2.pdf [file crt-2016-463-suppl2.pdf]

**S2 Table.** Hormone levels in patients treated with AI in combination with GnRH $\alpha$ 

| No. | PFS  | PD  | Baseline |      | 3 months           |                    | 6 months        |                    | 9 months          |                    | 12 months          |                    | 15 months          |                  | 21 months         |                 |
|-----|------|-----|----------|------|--------------------|--------------------|-----------------|--------------------|-------------------|--------------------|--------------------|--------------------|--------------------|------------------|-------------------|-----------------|
|     |      |     | FSH      | E2   | FSH                | E2                 | FSH             | E2                 | FSH               | E2                 | FSH                | E2                 | FSH                | E2               | FSH               | E2              |
| 1   | 1.3  | Yes | 6.3      | 22   | -                  | -                  |                 |                    |                   |                    |                    |                    |                    |                  |                   |                 |
| 2   | 1.7  | Yes | 10.7     | 10   | -                  | -                  |                 |                    |                   |                    |                    |                    |                    |                  |                   |                 |
| 3   | 2.0  | Yes | 8.7      | 11   | 15.2 <sup>a)</sup> | 17 <sup>a)</sup>   |                 |                    |                   |                    |                    |                    |                    |                  |                   |                 |
| 4   | 2.6  | Yes | 18.3     | 15   | 2.2 <sup>a)</sup>  | 10 <sup>a)</sup>   |                 |                    |                   |                    |                    |                    |                    |                  |                   |                 |
| 5   | 3.0  | Yes | 52.3     | < 10 | 43.7 <sup>a)</sup> | < 10 <sup>a)</sup> |                 |                    |                   |                    |                    |                    |                    |                  |                   |                 |
| 6   | 3.0  | Yes | 0.3      | 121  | 0.4 <sup>a)</sup>  | 95 <sup>a)</sup>   |                 |                    |                   |                    |                    |                    |                    |                  |                   |                 |
| 7   | 5.2  | Yes | 5.5      | 152  | -                  | -                  |                 |                    |                   |                    |                    |                    |                    |                  |                   |                 |
| 8   | 5.6  | Yes | 1.4      | 11   | -                  | -                  |                 |                    |                   |                    |                    |                    |                    |                  |                   |                 |
| 9   | 5.9  | Yes | 2        | < 10 | 4.2                | < 10               | 5 <sup>a)</sup> | < 10 <sup>a)</sup> |                   |                    |                    |                    |                    |                  |                   |                 |
| 10  | 5.9  | Yes | 49.5     | 28   | -                  | -                  |                 |                    |                   |                    |                    |                    |                    |                  |                   |                 |
| 11  | 6.4  | Yes | 14       | 9    | 2.5                | 13                 | -               | -                  |                   |                    |                    |                    |                    |                  |                   |                 |
| 12  | 7.3  | No  | 0.7      | 10   | 6.4                | 10                 | 6.1             | 10                 |                   |                    |                    |                    |                    |                  |                   |                 |
| 13  | 7.4  | No  | 5.7      | 87   | 68                 | 105                | -               | -                  |                   |                    |                    |                    |                    |                  |                   |                 |
| 14  | 8.1  | Yes | 98.5     | 29   | 8.7                | < 10               | 10.5            | 16                 | 6.9 <sup>a)</sup> | < 10 <sup>a)</sup> |                    |                    |                    |                  |                   |                 |
| 15  | 8.2  | Yes | 30.5     | 41   | -                  | -                  | -               | -                  | -                 | -                  |                    |                    |                    |                  |                   |                 |
| 16  | 8.6  | Yes | 40.6     | 10   | -                  | -                  | -               | -                  | -                 | -                  |                    |                    |                    |                  |                   |                 |
| 17  | 11.5 | Yes | 6.1      | 158  | -                  | -                  | -               | -                  | -                 | -                  |                    |                    |                    |                  |                   |                 |
| 18  | 12.9 | Yes | 22.9     | < 10 | 4.1                | 13                 | 5.5             | < 10               | 5.4               | < 10               | 4.2 <sup>a)</sup>  | < 10 <sup>a)</sup> |                    |                  |                   |                 |
| 19  | 13.3 | Yes | 4.2      | 348  | 10.9               | 33                 | 12.2            | 4.8                | 7.7               | < 10 <sup>*</sup>  | 9.6 <sup>a)</sup>  | < 10 <sup>a)</sup> |                    |                  |                   |                 |
| 20  | 13.7 | Yes | -        | -    | 3.5                | 13                 | 4.6             | < 10               | -                 | -                  | 43.8 <sup>a)</sup> | < 10 <sup>a)</sup> |                    |                  |                   |                 |
| 21  | 14.0 | No  | 1.4      | < 10 | 2.7                | < 10               | 9.3             | < 10               | 7.2               | < 10               | 7.3                | < 10               |                    |                  |                   |                 |
| 22  | 14.3 | Yes | 4.9      | 105  | -                  | -                  | -               | -                  | -                 | -                  | -                  | -                  |                    |                  |                   |                 |
| 23  | 16.0 | Yes | 23.3     | 23   | -                  | -                  | 6.1             | < 10               | -                 | -                  | 10.2               | 35                 | 19.8 <sup>a)</sup> | 53 <sup>a)</sup> |                   |                 |
| 24  | 16.3 | Yes | -        | -    | -                  | -                  | -               | -                  | -                 | -                  | -                  | -                  | 4.9 <sup>a)</sup>  | 14 <sup>a)</sup> |                   |                 |
| 25  | 16.4 | Yes | 2.7      | < 10 | 3.8                | 11                 | 8.3             | 30                 | 9.1               | 25                 |                    |                    |                    |                  |                   |                 |
| 26  | 16.6 | Yes | 22.6     | 18   | 2.5                | 43                 | 3               | 46                 | 3.5               | 29                 | 11.2 <sup>a)</sup> | 71 <sup>a)</sup>   |                    |                  |                   |                 |
| 27  | 17.9 | Yes | 11.4     | 161  | 9.6                | 44                 | 11.7            | 48                 | 10.9              | 65                 | 8.8                | 28                 | 10.3               | 19               | 8.2 <sup>a)</sup> | 2 <sup>a)</sup> |

|    |      |     |      |      |     |      |      |      |     |      |     |      |                    |                   |                   |                    |
|----|------|-----|------|------|-----|------|------|------|-----|------|-----|------|--------------------|-------------------|-------------------|--------------------|
| 28 | 21.0 | Yes | 1.9  | 41   | 3.1 | 36   | 3.7  | 40   | 4.6 | 13   |     |      | 32.5               | 69                | 9 <sup>a)</sup>   | 158 <sup>a)</sup>  |
| 29 | 21.7 | Yes | 6.8  | < 10 | -   | -    | 6.8  | < 10 |     |      |     |      |                    |                   | 6 <sup>a)</sup>   | 37 <sup>a)</sup>   |
| 30 | 21.8 | Yes | 111  | < 10 | 137 | < 10 | 94.8 | < 10 | 131 | 18   | 87  | < 10 | 15.9 <sup>a)</sup> | 209 <sup>a)</sup> |                   |                    |
| 31 | 25.3 | Yes | 3.39 | < 10 | 5.3 | < 10 | 4.74 | < 10 | 2.8 | < 10 | 2.8 | < 10 | 3.5                | < 10              | 3.7               | < 10               |
| 32 | 27.2 | Yes | 4.2  | < 10 | -   | -    | -    | -    | -   | -    | -   | -    | -                  | -                 | 6.6 <sup>a)</sup> | 42 <sup>a)</sup>   |
| 33 | 28.7 | Yes | 21.6 | 150  | -   | -    | -    | -    | -   | -    | -   | -    | -                  | -                 | -                 | -                  |
| 34 | 29.0 | Yes | 77.7 | 16   | 5.7 | 159  | 5    | < 10 | -   | -    | -   | -    | -                  | -                 | 7.1 <sup>a)</sup> | < 10 <sup>a)</sup> |
| 35 | 37.6 | Yes | -    | -    | -   | -    | -    | -    | -   | -    | -   | -    | -                  | -                 | 7.4 <sup>a)</sup> | 49 <sup>a)</sup>   |
| 36 | 50.9 | Yes | -    | -    | 5.3 | 18   | -    | -    | 9.7 | 12   | 6.9 | 23   | 10.2               | <10               | -                 | -                  |

AI, aromatase inhibitor; GnRHa, gonadotropin-releasing hormone agonist; PFS, progression free survival; PD, progressive disease; FSH, follicle stimulating hormone; E2, estradiol. <sup>a)</sup>Laboratory results at the time of disease progression, written in the nearest time point.
